# Supplementary material
Source: PubMed Central journal article supplement (PMC7325525)
Supplement: NIHMS1597279-supplement-Supplemental_Figures.pdf [file NIHMS1597279-supplement-Supplemental_Figures.pdf]

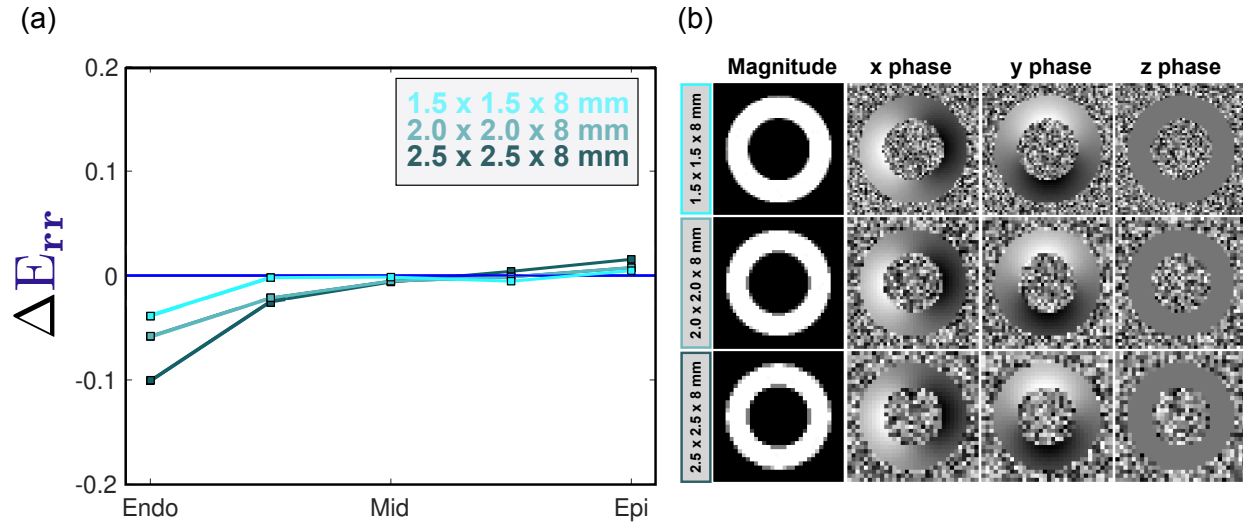

Fig. 1. Transmural  $\Delta E_{TT}$  for multiple DENSE in-plane resolutions. (a) Median  $\Delta E_{TT}$  (squares) from epi- to endocardium. Blue horizontal lines represent 0 strain bias. (b) Corresponding peak systolic DENSE magnitude and phase images for multiple in-plane resolutions.

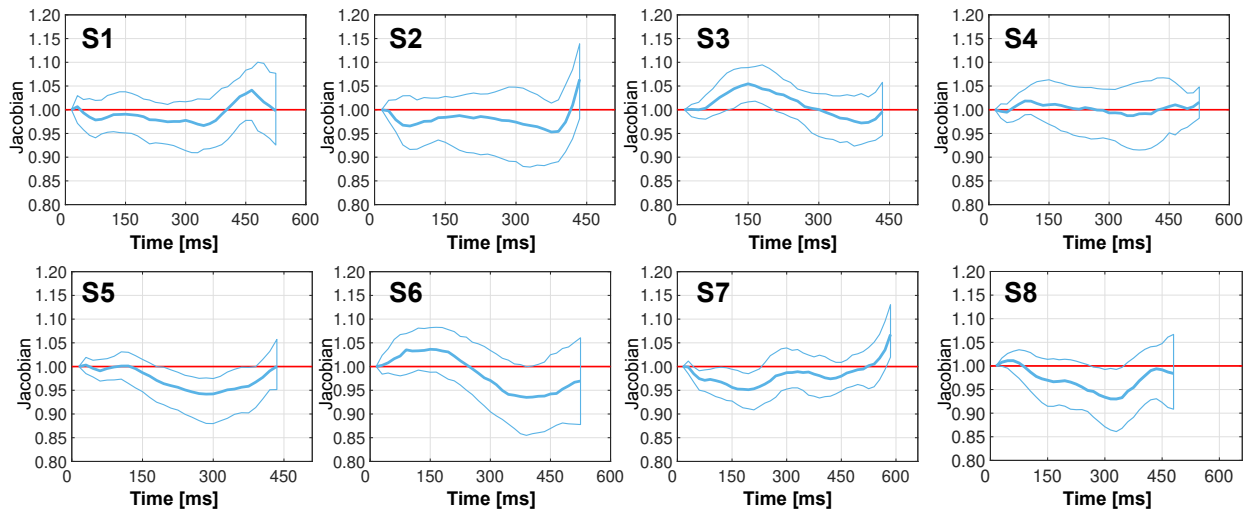

Fig. 2. Results for tissue compressibility through time across all subjects (S1-S8) computed as  $\det(\mathbf{F})$ . Solid blue line represents the median at each cardiac phase, and thin blue lines represent the 25th and 75th quartiles.  $\det(\mathbf{F}) = 1$  (horizontal red line) denotes perfectly incompressible myocardium. Lower values at peak systole are consistent with compression of the vascular compartment during this phase.

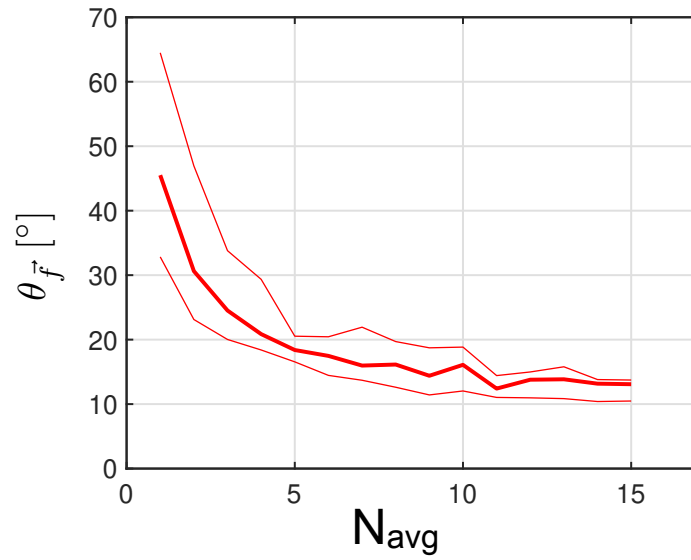

Fig. 3. Cone of uncertainty  $\theta_{\vec{f}}$  vs  $N_{\text{avg}}$  in the acquired mid-ventricular cDTI data. Median and 25th and 75th quartiles are shown for  $\theta_{\vec{f}}$  across all eight imaged subjects. Minimal decreases in  $\theta_{\vec{f}}$  were seen for  $N_{\text{avg}} > 11$ . After  $N_{\text{avg}} = 11$ ,  $\theta_{\vec{f}}$  converges to  $\sim 13^\circ$ .
